# Supplementary material
Source: Springer Nature journal article supplement (https://www.springermedizin.de/resource/supplementary/12877_2011_726_MOESM2_ESM.pdf/9440064)
Supplement: MOESM2 [file 9440064]

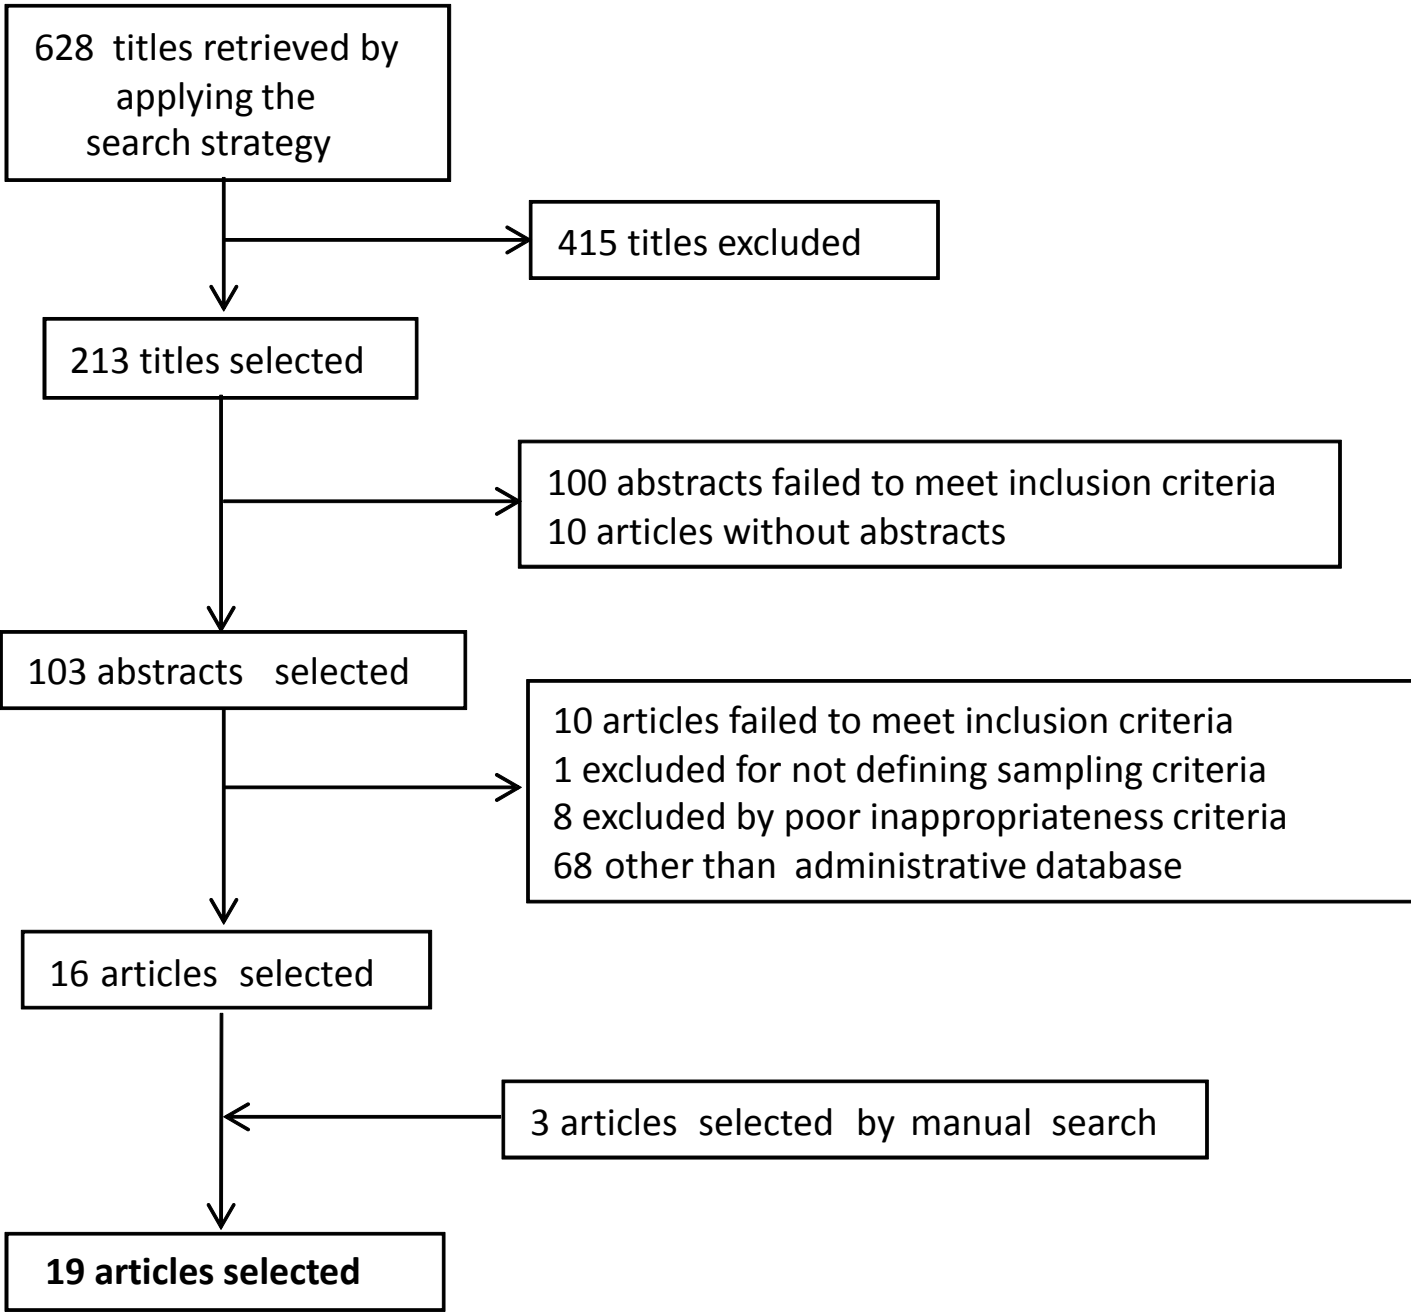

628 titles retrieved by applying the search strategy

415 titles excluded

213 titles selected

100 abstracts failed to meet inclusion criteria  
10 articles without abstracts

103 abstracts selected

10 articles failed to meet inclusion criteria  
1 excluded for not defining sampling criteria  
8 excluded by poor inappropriateness criteria  
68 other than administrative database

16 articles selected

3 articles selected by manual search

**19 articles selected**
